# Supplementary material for: Characterization of Cu2O/CuO heterostructure photocathode by tailoring CuO thickness for photoelectrochemical water splitting
Source: Royal Society of Chemistry journal article supplement (doi:10.1039/d1ra08863g), 2022-01-01
Supplement: d1ra08863g1.pdf [file d1ra08863g1.pdf]

## Supporting Information

### **Characterization of Cu<sub>2</sub>O/CuO Heterostructure Photocathode by Tailoring CuO Thickness for Photoelectrochemical Water Splitting**

Dasol Jeong<sup>1</sup>, Woohyeon Jo<sup>1,2</sup>, Jaebum Jeong<sup>1</sup>, Taegeon Kim<sup>1,3</sup>, Seungyeon Han<sup>1,2</sup>, Min-Kyu Son<sup>1\*</sup>, Hyunsung Jung<sup>1\*</sup>

<sup>1</sup> Nano Convergence Materials Center, Korea Institute of Ceramic Engineering & Technology (KICET), Jinju 52851, Republic of Korea

<sup>2</sup> Department of Materials Science and Engineering, Pusan National University, Busan 46241, Republic of Korea

<sup>3</sup> Department of Materials Engineering, Hanyang University, Ansan 15588, Republic of Korea

\*E-mail: [minkyu.son@kicet.re.kr](mailto:minkyu.son@kicet.re.kr) ; [hsjung@kicet.re.kr](mailto:hsjung@kicet.re.kr)

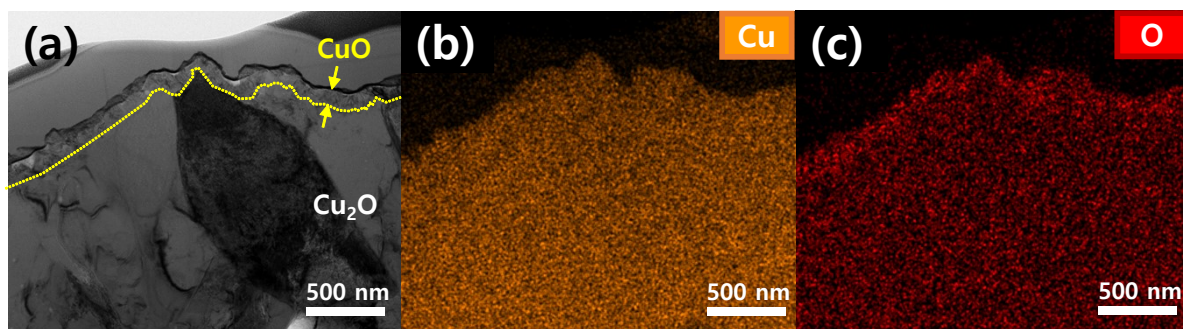

**Figure S1.** TEM and element mapping analysis of the annealed Cu<sub>2</sub>O film at 350 °C for 20 min.

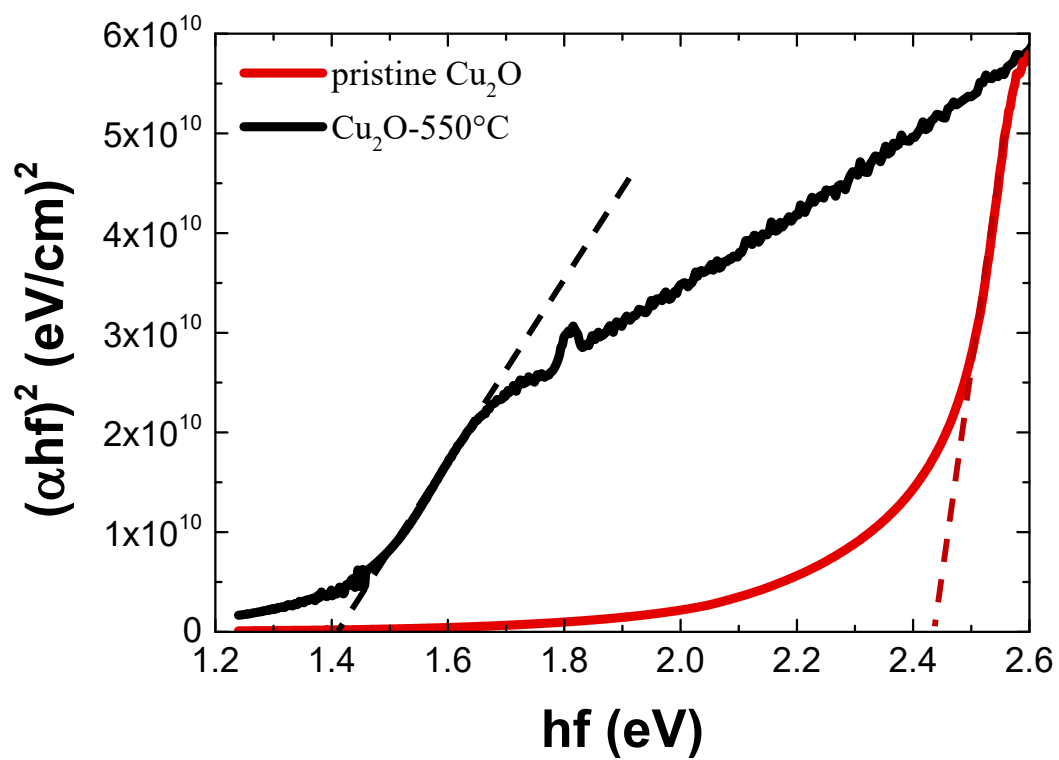

**Figure S2.** Tauc plot of pristine  $\text{Cu}_2\text{O}$  (pure  $\text{Cu}_2\text{O}$ ) and annealed  $\text{Cu}_2\text{O}$  (pure  $\text{CuO}$ ) at 550 °C for 20 min.

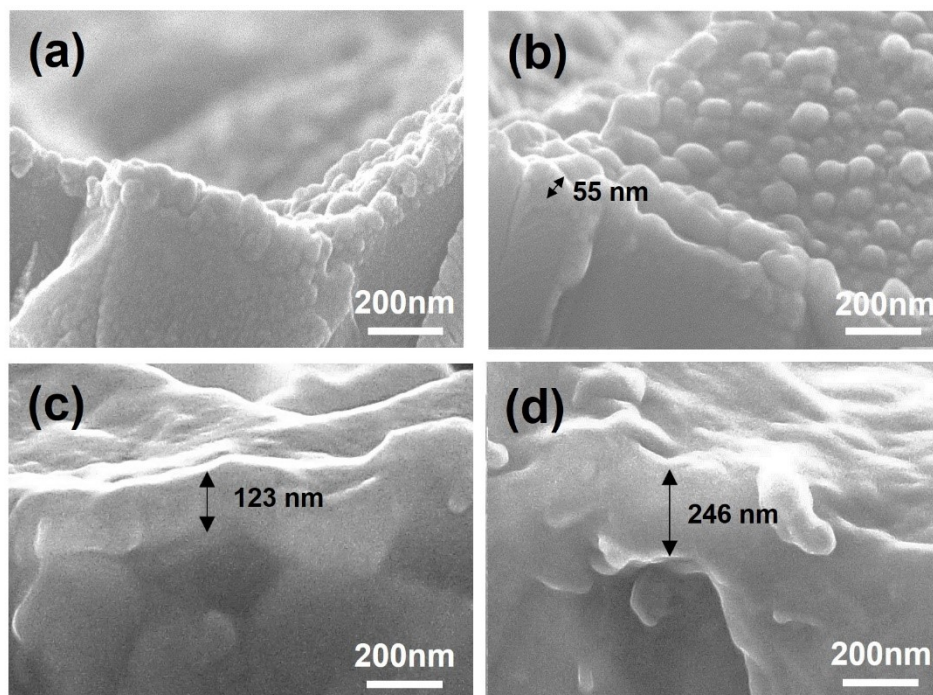

**Figure S3.** Cross-sectional SEM images of Cu<sub>2</sub>O/CuO films annealed at 350 °C for (a) 5 min, (b) 10 min, (c) 30 min, (d) 40 min.

**Table S1.** PEC performances of Cu<sub>2</sub>O/CuO photocathodes in our work and other literatures.

| Photocathode                                    | Electrolyte                                     | Current density (mA/cm <sup>2</sup> ) | Reference |
|-------------------------------------------------|-------------------------------------------------|---------------------------------------|-----------|
| Cu <sub>2</sub> O/CuO                           | 0.5 M Na <sub>2</sub> SO <sub>4</sub> (pH 6)    | - 2.8 (0 V vs RHE)                    | [4]       |
| Cu <sub>2</sub> O/CuO                           | 1 M Na <sub>2</sub> SO <sub>4</sub>             | - 1.4 (0 V vs RHE)                    | [11]      |
| Cu <sub>2</sub> O/CuO                           | 0.5 M Na <sub>2</sub> SO <sub>4</sub> (pH 6)    | - 0.45 (0.25 V vs RHE)                | [12]      |
| Cu <sub>2</sub> O nanowire/CuO nanoflake        | 0.5 M Na <sub>2</sub> SO <sub>4</sub> (pH 6)    | - 4 (0V vs RHE)                       | [13]      |
| Cu <sub>2</sub> O nanowire/CuO/TiO <sub>2</sub> | 1 M Na <sub>2</sub> SO <sub>4</sub> (pH 5)      | - 0.87 (0 V vs RHE)                   | [14]      |
| Cu <sub>2</sub> O/CuO/CuWO <sub>3</sub>         | 1 M Na <sub>2</sub> SO <sub>4</sub> (pH 7)      | - 1.9 (0 V vs RHE)                    | [15]      |
| Cu <sub>2</sub> O/CuO/C                         | 1 M Na <sub>2</sub> SO <sub>4</sub> (pH 5.5)    | - 6.5 (0 V vs RHE)                    | [16]      |
| Cu <sub>2</sub> O/CuO/CuS/Pt                    | 1 M Na <sub>2</sub> SO <sub>4</sub> (pH 5)      | - 6 (0V vs RHE)                       | [17]      |
| Cu <sub>2</sub> O/CuO/CuS                       | 0.5 M Na <sub>2</sub> SO <sub>4</sub> (pH 5)    | - 1.38 (0V vs RHE)                    | [18]      |
| Cu <sub>2</sub> O/CuO/Pt                        | .                                               | - 1.99 (0V vs RHE)                    | [19]      |
| Cu <sub>2</sub> O/CuO/Cu(OH) <sub>2</sub>       | 0.5 M Na <sub>2</sub> SO <sub>4</sub> (pH 6.8)  | - 2.3 (0V vs RHE)                     | [20]      |
| Cu <sub>2</sub> O/CuO                           | 0.1 M Na <sub>2</sub> SO <sub>4</sub> (pH 6.25) | - 1.2 (0V vs RHE)                     | Our work  |
